# Supplementary material
Source: publisher figshare collection journal article supplement (https://frontiersin.figshare.com/ndownloader/files/11622395)
Supplement: Supplementary file [file 11622395]

## *Supplementary Material*

### **Eicosapentaenoic acid enhances the effects of mesenchymal stromal cell therapy in experimental allergic asthma**

Soraia Carvalho Abreu, Miquéias Lopes-Pacheco, Adriana Lopes da Silva, Debora Gonçalves Xisto, Tainá Batista de Oliveira, Jamil Zola Kitoko, Lígia Lins de Castro, Natália Recardo Amorim, Vanessa Martins, Luisa H. A. Silva, Cassiano Felipe Gonçalves-de-Albuquerque, Hugo Caire de Castro Faria-Neto, Priscilla Christina Olsen, Daniel Jay Weiss, Marcelo Marcos Morales, Bruno Lourenço Diaz, Patricia Rieken Macêdo Rocco

**Correspondence:** Patricia R M Rocco, M.D., PhD: [prmrocco@gmail.com](mailto:prmrocco@gmail.com)

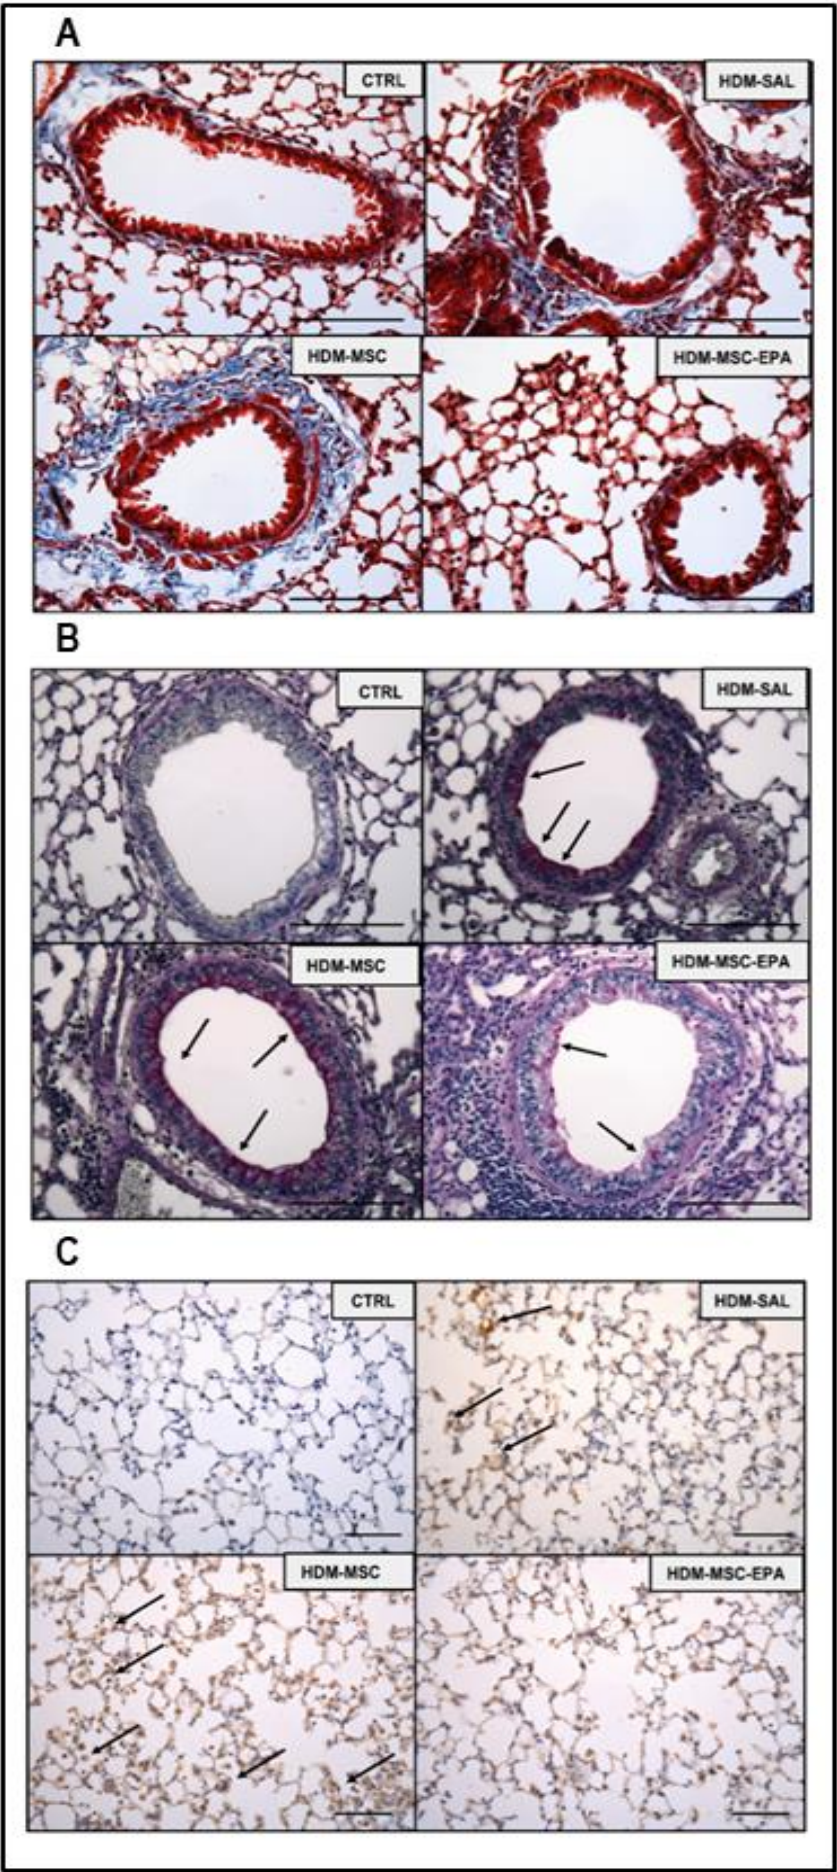

**Supplementary Figure 5. Lung morphological changes.** Representative photomicrographs of (A) airways stained with Masson's Trichrome, (B) airways stained with periodic acid-Schiff, and (C) immunohistochemical staining for smooth-muscle-specific  $\alpha$ -actin in lung tissue. In A, marked deposition of collagen fibers is visible in blue around the airways in the HDM and HDM-MSc groups. In B, there is mucus hypersecretion in the airways (stained purple, arrows) in HDM and HDM-MSc groups. In C, note positive staining for  $\alpha$ -actin (brown dots, arrows) in HDM and HDM-MSc. CTRL: saline-challenge mice; HDM: HDM-challenge mice; SAL: mice treated with saline; MSc: mice treated with unstimulated MScs; HDM-EPA: mice treated with EPA-stimulated MScs. Original magnification:  $\times 400$  (A, B) and  $\times 200$  (C). *Bar* = 100  $\mu$ m. Analysis was performed in 8 specimens from each group.
